# Occupational Exposures to Blood and Body Fluids among Healthcare Workers in Ethiopia: A Systematic Review and Meta-Analysis

Biniyam Sahiledengle<sup>1\*</sup>, Yohannes Tekalegn<sup>1</sup>, Demelash Woldeyohannes<sup>2</sup>, Bruce John Edward  
Quisido<sup>3</sup>

<sup>1</sup>Department of Public Health, Mada Walabu University Goba Referral Hospital, Bale Goba,  
Ethiopia

<sup>2</sup>Department of Public Health, College of Medicine and Health Science, Wachemo University,  
Hosanna, Ethiopia

<sup>3</sup>Department of Nursing, College of Health Science, Mada Walabu University Goba Referral  
hospital, Bale-Goba, Ethiopia

\*Corresponding author

## Corresponding author's full address

Biniyam Sahiledengle, MPH,

Mada Walabu University Goba Referral Hospital, Bale Goba, Ethiopia

P.o. Box: 76

Bale-Goba

Ethiopia

Cell phone: +251-911 56 03 09

ORCID: [0000-0002-1114-4849](https://orcid.org/0000-0002-1114-4849)

Email: [biniyam.sahiledengle@gmail.com](mailto:biniyam.sahiledengle@gmail.com)

## 24 **Abstract**

25 **Background:** Occupational exposure to blood and body fluids is a major risk factor for the  
26 transmission of blood-borne infections to healthcare workers. There are several primary studies  
27 in Ethiopia yet they might not be at the national level to quantify the extent of occupational  
28 blood and body fluid exposures among the healthcare workers. This systematic review and meta-  
29 analysis aimed to estimate the pooled prevalence of occupational blood and body fluid exposure  
30 of health-care workers in Ethiopia.

31 **Methods:** PubMed, Science Direct, Hinari, Google Scholar, and the Cochrane library were  
32 systematically searched; withal, the references of appended articles were also checked for further  
33 possible sources. The Cochrane Q test statistics and  $I^2$  tests were used to assess the  
34 heterogeneity of the included studies. A random-effects meta-analysis model was used to  
35 estimate the lifetime and 12-month prevalence of occupational exposure to blood and body fluids  
36 among health-care workers in Ethiopia.

37 **Results:** Of the 641 articles identified through the database search, 37 studies were included in  
38 the final analysis. The estimated pooled lifetime and 12-month prevalence on occupational  
39 exposure to blood and body fluids among healthcare workers were found to be at 54.15% (95%  
40 confidence interval (CI): 47.54–60.75) and 44.24% (95%CI: 36.98-51.51), respectively. The  
41 study identified a variation in healthcare workers whom were exposed to blood and body fluids  
42 across Ethiopian regions.

43 **Conclusion:** The finding of the present study revealed that there was a high level of annual and  
44 lifetime exposures to blood and body fluids among the healthcare workers of Ethiopia.

45 **Keywords:** Blood and body fluid, Ethiopia, Healthcare workers, Occupational exposure, Splash  
46

## 47 **Introduction**

48 Occupational exposure to blood and body fluids (BBFs) is a major risk factor for the  
49 transmission of blood-borne infections to healthcare workers (HCWs). These exposures can  
50 heighten the risk of infection to Human Immunodeficiency Virus (HIV), Hepatitis B, and  
51 Hepatitis C. In many cases, exposures occur through a needle stick or contact in the eyes, nose,  
52 mouth, or when a broken skin comes in contact with the patient's blood or body fluid [1,2].

53 According to the World Health Organization (WHO), it is estimated that about 3 million HCWs  
54 are exposed to bloodborne pathogens each year – occupational exposure causes approximately  
55 170,000 to HIV infections, 2 million to HBV infections, and 0.9 million to HCV infections [3].  
56 A recent review also stipulated that the prevalence of infections, such as HCV is significantly  
57 higher in HCWs than in the general population [1]. And more than 90% of HIV, HBV, and HCV  
58 exposures transpire in the developing countries [4].

59 Antecedent literatures publicized that blood or blood products accounted for 66% of exposures  
60 and the remaining involved vomits, urines, amniotic fluids, and cerebrospinal fluids; saliva;  
61 sputum; and other BBFs; 28% of these cases were fluids which contained visible bloods, and in  
62 some exposure incidents, multiple body areas were splashed or sprayed with these body fluids.  
63 The face is the most common exposure site reported: healthcare workers' eyes (conjunctiva) were  
64 exposed to BBF (53%) of all reported cases. The mucosa of the mouth and nose were exposed in  
65 11% and 5% of cases, respectively [5,6,7].

66 In sub-Saharan Africa, HCWs are at consequential risk of infection from blood-borne pathogens  
67 because of the excessive prevalence of such blood-borne infections in the general population  
68 [5,8]. A systematic review conducted in 21 African countries found a high prevalence of  
69 occupational exposures to blood and body fluids among HCWs – about two-thirds were exposed  
70 during their entire career, and almost half of them were exposed each year [9]. Additionally,  
71 evidence from every region of Africa indicates considerable variations in the prevalence of blood  
72 and body fluid exposures. The 12-month prevalence of all the types of occupational exposure to  
73 blood and body fluids ranged from 17.0% to 67.6% in Kenyan and Burundian studies. The  
74 estimated pooled 12-month prevalence was 48.0%. Regional pooled estimates covered from  
75 33.9% to 60.7% in Southern Africa and Northern Africa [9].

76 In Ethiopia, occupational exposure to BBFs is a pressing concern and continues to have a  
77 significant problem in its healthcare system [10-14]. Antecedent studies also reported that

78 standard precaution practices among HCWs were suboptimal, and the lack of compliance with  
79 these measures is still a great lookout [11, 13, 15, 16]. Though attention is paid to the safety of  
80 HCWs through the National Infection Prevention and Patient Safety (IPPS) initiatives, the  
81 number of exposures to BBFs reported did not manifest a sign of decline as evidenced by some  
82 studies [11,14,15,18].

83 Several primary studies in Ethiopia conveyed a high prevalence of occupational exposures to  
84 BBFs. However, the results were inconsistent [11,16-23]. For some instances, in Central  
85 Ethiopia, the prevalence of a 12-month BBF exposures among HCWs was 19.9% [11] and  
86 41.3% [20]; in North Ethiopia 60.2% [16] and 31.7% [21]; and in East Ethiopia 43.8% [17] and  
87 20.2% [14]. Currently in Ethiopia, no report exists to quantify the pooled prevalence of BBF  
88 exposures among its HCWs, even the existing review determined the prevalence of needle stick  
89 injury and did not estimate BBF exposures [24]. Moreover, the epidemiology of blood-borne  
90 infections in Ethiopia is on the rise and dynamically changing over the past decades, along with  
91 poor compliance toward standard precautions among HCWs. Given these developments, it is  
92 timely and crucial to investigate the burden of occupational BBF exposures among HCWs.  
93 Therefore, the objective of the present systematic review and meta-analysis directs to estimate  
94 the pooled prevalence of BBFs among HCWs in Ethiopia.

95

## 96 **Methods**

97 This systematic review and meta-analysis were conducted subsequent to "the Preferred  
98 Reporting Items for Systematic Reviews and Meta-Analyses (PRISMA)" guidelines [25]. Studies  
99 were favoured according to the criteria outlined below (**Appendices A**).

100

### 101 **Eligibility Criteria**

#### 102 **Study Designs and**

103 In this review, we appended cross-sectional studies and baseline assessment of longitudinal  
104 studies. Studies that reported the lifetime and/or 12-month prevalence of occupational exposure  
105 through blood and/or body fluid exposures to mucous membranes and broken skins were eligible  
106 to be included in the present review. Systematic reviews, letters to editors, short  
107 communications, qualitative studies, case series, case-control studies, and case reports were  
108 excluded. Also, articles that were not fully accessible, unsuccessful two-email contacts with the  
109 primary/corresponding authors were excluded, too. In addition to the aforementioned, studies  
110 restricted to HCWs' needle stick and/or sharp injuries were excluded when data were not  
111 provided separately for blood and body fluid exposures. Lastly, the aggregate reports for blood  
112 and/or body fluid exposures and needle stick and/or sharps injuries were debarred from the  
113 study.

114

#### 115 **Participants**

116 Studies who met the following criteria were considered for inclusion:

117 Population: Healthcare works (HCWs) with direct contact to patients or blood/body fluids. We  
118 also encompassed studies which were conducted on a specific segment of the healthcare  
119 workforce (such as physicians, nurses, midwives, laboratory technicians, and cleaners).

120 Exposure: study examines occupational BBFs exposures

121

#### 122 **Study Period**

123 No restriction on publication date.

124

#### 125 **Language**

126 Articles which were only reported in the English language.

127

## 128 **Article Searching Strategy**

129 MEDLINE/PubMed, Hinari, Science Direct, and the Cochrane Library databases from inception  
130 until January 31, 2020, that reported the prevalence of occupational exposures to blood and/or  
131 body fluids among HCWs in Ethiopia were sought. Literature search strategies were developed  
132 using medical subject headings (MeSH) and text words related to occupational blood and/or  
133 body fluid exposures. The following search terms were used and combined using Boolean  
134 operators: "prevalence", "magnitude", "occupation", "exposure", "accident", "occupational  
135 exposure", "accidental exposure", "accidental occupational exposure", "occupational disease",  
136 "occupational hazard" , "cross-infection", "blood", "body fluid", "blood spill", "blood-borne  
137 pathogens", "blood-borne infection", "health-care workers", "health workers", "medical  
138 personnel", "health personnel" and "Ethiopia". The electronic database search was also  
139 supplemented by searching for gray literature through Google scholar, Google searching, and  
140 Ethiopian University digital repositories (such as the Addis Ababa University Digital Library).  
141 To ensure literature saturation, the reference list of appended studies and/or relevant studies  
142 identified through the search were scanned as well. Finally, the literature search was limited to  
143 the English language and human subjects (**Appendices B**).

144

## 145 **Operational Definition**

146

147 **Occupational Blood and Body Fluid Exposure:** In this review, "occupational blood and body  
148 fluid exposure" is defined as any exposure to potentially harmful biological agents or infectious  
149 materials that occurs as a result of one's occupation, which includes the patient's blood and other  
150 body fluids. We appended studies that reported the lifetime or 12-month prevalence of  
151 occupational exposure through blood and body fluid contacts from at least one of these routes  
152 (eye, mouth, mucous membrane, and non-intact skin).

153

154 **Healthcare Workers:** Healthcare workers (HCWs) are referred to as paid or unpaid individuals  
155 (eg: full-time employees or medical students) working in a health-care setting whose activities  
156 involve direct contact with patients, or with blood or other body fluids from the patients. Hence,  
157 we incorporated studies which involved physicians, nurses, midwives, health officers, laboratory

158 technicians, anesthetists, auxiliary healthcare workers, residents, or interns undertaking clinical  
159 training or gaining experiences in the health-care settings.

160

### 161 **Study Selection and Data Extraction**

162 In this review, all the searched articles were imported into the EndNote version X<sup>4</sup> software, and  
163 after that, the duplicate articles were removed. Two investigators (BS and YT) independently  
164 screened and identified articles by their titles, abstracts, and full-texts to determine eligibilities  
165 against predetermined inclusion and exclusion criteria. Afterwards, the screened articles were  
166 compiled together by the two investigators, and discrepancies were resolved through unanimous  
167 consensus.

168 The data extraction form was prepared using Microsoft Excel Spreadsheet. Two reviewers  
169 extracted data from the studies and were entered into Microsoft Excel. The data extraction form  
170 included: (i) name of primary author; (ii) year of publication; (iii) region; (iv) sample size; (v)  
171 study population; (vi) type of study design; (vii) sampling technique (viii) response rate and (ix);  
172 12 months and lifetime prevalence of blood and body fluid exposure among HCWs.

173

### 174 **Quality Assessment**

175 The qualities of the appended studies were assessed and the risks for biases were judged using  
176 the Joanna Briggs Institute (JBI) quality assessment tool for the prevalence studies [26]. There  
177 were nine parameters: (1) appropriate sampling frame, (2) proper sampling technique, (3)  
178 adequate sample size, (4) study subject and setting description, (5) sufficient data analysis, (6)  
179 use of valid methods for the identified conditions, (7) valid measurement for all participants, (8)  
180 using appropriate statistical analysis, and (9) adequate response rate (adequate if 60% or higher).  
181 Failure to satisfy each parameter was scored as 1 if not 0. The risks for biases were classified as  
182 either low (total score: 0 to 2), moderate (total score: 3 or 4), or high (total score: 5 to 9). Two  
183 reviewers (BS and YT) assessed the quality of the studies included. Finally, articles with scores  
184 of 5 to 9, which meant having a high risk of biases were debarred (**Appendices C**).

185

### 186 **Statistical Analysis**

187 Primarily, appended studies were categorized whether they have measured the lifetime  
188 prevalence of blood and body fluid exposures or whether they are on a 12-month prevalence, and

189 later were entered into the STATA version 14. The meta pop program was utilized to estimate  
190 the pooled prevalence of lifetime and 12-month prevalence of blood and body fluid exposure  
191 among HCWs. Accordingly, the prevalence of blood and body fluid exposure (p) were estimated  
192 using data from the appended studies which reported the proportion of HCWs whom were  
193 exposed to body fluids at any time during their career, and twelve-month prevalence was  
194 appraised using data from the studies which reported the proportion of participants exposed to  
195 body fluids in the preceding 12 months. Corresponding standard errors (SE) were calculated  
196 using  $se = \sqrt{p(1 - p)/n}$ . The researchers estimated the pooled prevalence of blood and body fluid  
197 exposures using random-effects meta-analysis based on the DerSimonian and Laird approach.  
198 The existence of heterogeneity among the studies was checked using the  $I^2$  test statistics.  
199 Heterogeneity will be classified into the following three categories: low heterogeneity ( $I^2$  index <  
200 25%), average heterogeneity ( $I^2$  index= 25–75%), and high heterogeneity ( $I^2$  index > 75%). Also,  
201 a p-value of < 0.05 is used to declare heterogeneity. Thus, a random-effects model was used to  
202 analyze data in this study, since the estimated both 12 months and lifetime prevalence of BBFs  
203 was found to be high. Finally, Meta-regression analysis was used to evaluate the association  
204 between the prevalence of BBFs and publication year, and sample size in the selected studies.

205

### 206 **Publication Bias**

207 In this meta-analysis, possible publication biases were visualized thru funnel plots. Symmetrical  
208 large inverted funnels resembled the absence of publication biases. Also, the probability of  
209 publication biases were tested using two main statistical methods (Egger's and Begg's tests)  
210 which were wield to test funnel plot asymmetries. The level of significance for asymmetries  
211 were viewed as  $p < 0.05$ .

212

### 213 **Sensitivity Analysis**

214 Also, sensitivity analyses were undertaken – the stability of the pooled estimate for each study.  
215 The investigation was done by excluding a single individual study from the analysis at a time to  
216 explore the robustness of the findings.

217

218



## 219 **Results**

### 220 **Description of the Studies**

221 The initial electronic searches generated 641 studies using international databases and Ethiopian  
222 university research repositories. The database included PubMed (82), Science Direct (61), Hinari  
223 (279), Google Scholar (196), Cochrane Library (1), and the remaining 22 studies were identified  
224 through manual search. Of these, 151 duplicates were identified and effaced. From the tarry of  
225 490 articles, based on the pre-defined eligibility criteria, 428 articles were excluded after reading  
226 their titles and abstracts. 62 full-text articles remained and were further assessed for their  
227 eligibilities. Finally, based on the pre-defined inclusion and exclusion criteria and quality  
228 assessment, only 37 articles were extracted for the final analyses [10-14, 16-23, 27-50] (**Fig. 1**).

229

### 230 **Characteristics of the Appended Studies**

231 The general characteristics of the favored articles were presented in **Table 1**. Of the 37 articles  
232 included in this review and meta-analyses, 14 were conducted in Addis Ababa; 10 in the Amhara  
233 Region; 6 in Oromia Region; 4 from the Southern Nations, Nationalities, and People (SNNP); 2  
234 in Harari Region; and only 1 from Tigray Region. A total number of 11,168 healthcare workers  
235 participated in the study – the highest and lowest sample sizes were from the studies of  
236 Geberemariam et al. [13] in the Oromia Region (648 HCWs), and [47] in Addis Ababa (104  
237 HCWs). All the appended studies were cross-sectional studies. Twenty-three studies were  
238 conducted solely among hospital healthcare workers. Among the studies, twenty-three of them  
239 also presented data regarding 12-month prevalence on occupational exposures to BBFs [10-12,  
240 14, 16, 17, 19-23, 27-29, 35, 37-39, 44-47, 49], and the lifetime prevalence on BBF exposures  
241 were reported in twenty-six studies [11-15, 18-20, 22, 28-34, 36, 39-43, 45, 46, 48, 50]. From  
242 the studies, thirteen articles have reported having both the 12-month and lifetime BBFs exposure  
243 prevalence [10-12, 14, 19, 20, 22, 28, 29, 39, 44-46]. The latest article was published in 2020  
244 [10], and the earliest study was concluded last 2007 [45]. The prevalence of 12 months BBFs  
245 among the Ethiopian HCWs ranged from 16.5% [12] to 67.5% [23] in Addis Ababa Region. The  
246 lifetime prevalence of BBFs varied from 28.8% in the Harari Region [14] to 81.0% in the  
247 Amhara Region [33]. In this review, a low risk of bias was realized in 33 (89.2%) of the  
248 included studies (**Appendices C**).

249

## 250 **Prevalence of Blood and Body Fluid Exposures among HCWs in Ethiopia**

251 The current meta-analysis using the random-effects model conveyed that the estimated overall  
252 pooled prevalence of 12 months BBF exposures among HCWs in Ethiopia was 44.24% (95%CI:  
253 36.98-51.51) with a significant level of heterogeneity ( $I^2 = 97.9\%$ ;  $p < 0.001$ ) (**Fig. 2**). The  
254 lifetime pooled prevalence of BBFs using the random-effects model was 54.15% (95% CI 47.54-  
255 60.75) with a significant level of heterogeneity ( $I^2 = 97.6\%$ ;  $p < 0.001$ ) (**Fig. 3**).

## 257 **Investigation of Heterogeneity and Subgroup Analysis**

258 The included studies in this meta-analysis exhibited a statistically significant heterogeneity  
259 between studies ( $I^2 = 97.9\%$ ;  $p < 0.001$ , and  $I^2 = 97.6\%$ ;  $p < 0.001$ ) for the 12-month and lifetime  
260 BBF exposure prevalence estimates, respectively. Accordingly, the random-effects model was  
261 used to adjust the observed variability. In identifying the possible source of heterogeneity,  
262 subgroup analyses were utilized based on the geographical regions, type of healthcare facilities,  
263 year of publication, and sample size. However, the level of heterogeneity between studies  
264 remained high after subgroup analysis (**Table 2**).

265 The prevalence of 12 months BBFs was found to be higher in the Tigray Region 60.20 %  
266 (95%CI: 55.83-64.57) and the least was reported from the Harari Region 31.86% (95%CI: 8.73-  
267 54.98). This meta-analysis also found that the lifetime prevalence of BBF exposures differed  
268 between various regions, and the highest prevalence was found in the Amhara Region, 60.83%  
269 (95%CI: 47.03-74.62), followed by SNNP Region, 54.35% (95%CI: 28.38-80.31), and finally,  
270 the least in Harari Region, 20.80% (95%CI: 24.76-32.83). Withal, the 12 months and lifetime  
271 prevalence of BBF exposures were 41.04 (95%CI: 30.63-51.45) and 56.56% (95%CI: 49.44-  
272 63.68) in studies published between 2015 and 2020, respectively (**Table 2**).

## 274 **Sensitivity Analysis**

275 To identify the source of heterogeneity and to explore the robustness of the findings, a leave-one-  
276 out sensitivity analysis was employed. The result of sensitivity analyses using the random-effects  
277 model revealed that no single study influenced the overall prevalence of 12 months and lifetime  
278 BBF exposures among HCWs (**Appendices D**).

279  
280

281 **The Publication Bias**

282 The presence of publication bias was evaluated using funnel plots and Egger's tests at a  
283 significance level of less than 0.05. The findings revealed that publication bias was not  
284 significant for the studies reported in the 12-month prevalence of BBF exposures ( $p = 0.05$ ) (**Fig.**  
285 **4**). In the same manner, it was not statistically significant ( $p = 0.92$ ) for the lifetime BBFs  
286 exposures, as well (**Fig. 5**).

287

288 **Meta-Regression Analysis**

289 The results of the meta-regression analysis showed that the publication year and the sample size  
290 were not significant sources of heterogeneity. In this study, no significant relationship were  
291 identified between the 12 month prevalence of BBFs and publication year ( $p$ -value=0.76), and  
292 sample size ( $p$ -value= 0.44). Similarly, there was no significant association between the lifetime  
293 prevalence of BBFs and publication year ( $p$ -value=0.42) and sample size ( $p$ -value= 0.48) (**Table**  
294 **3**).

295

## 296 Discussion

297 Each year, hundreds of thousands of HCWs, including waste handlers, face the risk of blood-  
298 borne diseases due to occupational BBF exposures [3, 8, 9, 51]. In Ethiopia, despite the  
299 recognition on the importance of HBV, HCV, HIV, and other diseases transmitted through BBFs  
300 by the Federal Ministry of Health (FMOH), currently, there is dearth of systematic reviews and  
301 meta-analyses that estimated the prevalence of BBFs exposure among HCWs. In this reckon, this  
302 study was the first systematic review and meta-analysis that aimed to estimate lifetime and a 12-  
303 month prevalence on occupational exposure to BBFs among Ethiopian HCWs. This review  
304 involved the results of 37 articles which investigated the prevalence of BBF exposures, and a  
305 high burden on occupational exposures to BBFs among HCWs in Ethiopia was evidently  
306 identified.

307 The estimated pooled 12- month and lifetime prevalence on BBF exposures among HCWs in  
308 Ethiopia were 44.2% and 54.2%, respectively. Forbye, the 12- month BBFs prevalence in the  
309 primary studies ranged from 16.5% [12] to 67.5% [23]. In parallel, the lifetime prevalence  
310 ranged from 28.8% [14] and 81.0% [33]. This 12-month pooled prevalence estimate was almost  
311 comparable from the pooled estimate from East Africa (47.3%) [9], Côte d'Ivoire, Mali and  
312 Senegal (45.7%) [52], and a study by Bi P et from Australia, revealed that 42% of HCWs had  
313 body fluid exposures in a year on their study [53]. However, it was lower than the studies  
314 conducted in Turkey (57%) [54] and Nigeria 67.5% [55]. These differences might be subjected  
315 to the variances in the socio-demographic, cultural characteristics of study participants, and study  
316 health facility setup variations.

317 This study explicated a higher prevalence of lifetime BBF exposures (54.2%), however, it was  
318 subservient than the reviews from the 65 studies in 21 African countries (65.7%) [9]. The  
319 foremost reason for this variation may be due to study setting dissimilarities. This finding is also  
320 inconsistent with a study in Iran which reported the prevalence of exposures at 46.47% [56]. The  
321 variance could be due to the discrepancies in the study participants, the type of healthcare  
322 facilities, and socio-demographic factors.

323 In this review, the researchers identified a variation in the HCWs' exposure to BBFs across the  
324 Ethiopian regions. The lifetime (60.83% in Amhara Region) and 12 months (60.20% in Tigray  
325 Region and 48.69% in Amhara Region) occupational exposure to BBFs were consistently more  
326 frequent in Northern Ethiopia, and less in Harari Region (lifetime prevalence of 28.80% and 12-

327 month prevalence of 31.86%). The probable rationale for these regional variations may be due  
328 to: the number of studies included; type of healthcare facilities; and geographical and  
329 demographical differences. The other possible vindication for these disparities may be partially  
330 explained by the polarities in the levels of standard precaution practices among the HCWs in the  
331 various regions. As one study reported, 80.8% of the HCWs regularly follow standard  
332 precautions in Eastern Ethiopia, including the Harari Region [14].

333 A laudative prevalence of BBF exposures among HCWs working exclusively in hospitals than  
334 those in the health centers (primary healthcare units) was also found. Almost half of the HCWs  
335 working in hospitals of Ethiopia had at least one BBFs exposure in their lifetime and in the last  
336 12 months. The finding was predictable because these HCWs had higher workloads and they  
337 performed further medical procedures, which may have exposed them to occupational BBFs  
338 compared to those in the health centers. Therewithal, the high prevalence of BBF exposures  
339 among HCWs working in the hospitals had significant implications because most of the blood-  
340 borne viruses, such as HCV, HBV, and HIV, may haply spread through BBFs exposures,  
341 therefore, enhancing HCWs' compliance towards standard precautionary measures is deemed  
342 necessary.

343

### 344 **Limitations**

345 This review article had a few adversities due to its limitations. One of which was the cross-  
346 sectional design nature of the included studies and all were based on self-reported data whilst  
347 estimating the prevalence of occupational BBFs exposures. Additionally, social desirability and  
348 recall biases were likely present. Since the study was conducted in Ethiopia, included healthcare  
349 facilities and the generalization of the study findings was limited to these similar contexts.  
350 Further, there was no study obtained from the some Ethiopian regions, such as Afar Regional  
351 State and Benshangul-Gumuz Regional State and this might probably affect the generalizability  
352 of the present findings at a national level.

### 353 **Conclusions**

354 This review exhibited a higher percentage of occupational exposures to BBFs among HCWs in  
355 Ethiopia. The available evidences suggest that more than two-in-five and one-half of healthcare  
356 workers in Ethiopia were exposed to BBFs annually and in their lifetime, respectively.

357 Therefore, efforts should be implemented to reduce the high burden of occupational blood and  
358 body fluid exposures through effective implementation of standard precaution measures along  
359 with aggressive occupational health and safety activities.

360

## 361 **Abbreviations**

362 AOR: Adjusted odds ratio; BBFs: Blood and body fluids; HCWs: Healthcare workers; CI:  
363 Confidence interval; IPPS: Infection Prevention and Patient Safety; PRISMA: Preferred  
364 Reporting Items for Systematic Reviews and Meta-Analyses; WHO: World Health Organization

## 365 **Declarations**

### 366 **Ethics approval and consent to participate**

367 Not Applicable

### 368 **Consent for publication**

369 Not Applicable

### 370 **Availability of supporting data**

371 All relevant data are within the manuscript and its supporting information files.

### 372 **Competing interests**

373 The author declares that he has no competing interests.

### 374 **Funding**

375 No fund was received for the present review.

### 376 **Authors' Contribution**

377 BS: Conceptualizes, design the study and data curation, performed the analysis, wrote and  
378 approved the final manuscript. YT: Data curation and performed the analysis, and approved the  
379 final manuscript DW: Contribute to the analysis, critically reviewed the manuscript and

380 approved the final manuscript. BJ: critically revised the manuscript and approved the final  
381 manuscript. All authors read and approved the final manuscript before submission.

## 382 **Acknowledgments**

383 The authors acknowledge Madda Walabu University, College of Health Sciences staff for their  
384 support during this research work.

385

## 386 Reference

- 387 1. Westermann C, Peters C, Lisiak B, Lamberti M, Nienhaus A. The prevalence of hepatitis  
388 C among healthcare workers: a systematic review and meta-analysis. *Occup Environ*  
389 *Med.* 2015;72(12):880-8
- 390 2. Deuffic-Burban S, Delarocque-Astagneau E, Abiteboul D, Bouvet E, Yazdanpanah Y.  
391 Blood-borne viruses in health care workers: prevention and management. *J Clinical*  
392 *Virology.* 2011;52(1):4-10.
- 393 3. World Health Organization [Internet]. Health Care Worker Safety 2016. [cited 2020  
394 March 23]. Available  
395 from: [http://www.who.int/injection\\_safety/toolbox/en/AM\\_HCW\\_Safety\\_EN.pdf](http://www.who.int/injection_safety/toolbox/en/AM_HCW_Safety_EN.pdf)
- 396 4. Belyhun Y, Maier M, Mulu A, Diro E, Liebert UG. Hepatitis viruses in Ethiopia: a  
397 systematic review and meta-analysis. *BMC Infect Dis.* 2016;16(1):761.
- 398 5. Centers for Disease Control and Prevention (National Center for HIV, STD, and TB  
399 Prevention, Divisions of HIV/AIDS Prevention): Surveillance of Health Care Workers  
400 with HIV/AIDS [Internet]. [cited 2020 March 12]. Available  
401 <http://www.cdc.gov/hiv/pubs/facts/hcwsurv.htm>
- 402 6. Ippolito G, Puro V, Petrosillo N, De Carli G, Micheloni G, Magliano E. Simultaneous  
403 infection with HIV and hepatitis C virus following occupational conjunctival blood  
404 exposure. *Jama.* 1998; 280(1):28-28.
- 405 7. Jagger J, Perry J. Avoiding blood and body fluid exposures. *Nursing* 2019.  
406 2002;32(8):68.
- 407 8. World Health Organization. The world health report 2002: reducing risks, promoting  
408 healthy life. World Health Organization; 2002.
- 409 9. Auta A, Adewuyi EO, Tor-Anyiin A, Aziz D, Ogbale E, Ogbonna BO, Adeloje D.  
410 Health-care workers' occupational exposures to body fluids in 21 countries in Africa:  
411 systematic review and meta-analysis. *Bull. World Health Organ.* 2017;95(12):831.
- 412 10. Zenbaba D, Bogale D, Sahiledengle B, Woldeyohannes D, Tekalegn Y. Prevalence and  
413 factors associated with needle-stick injuries and splash with blood and body fluids among  
414 healthcare workers in hospitals of Bale Zone, Southeast Ethiopia. *Ethiop Med J.*  
415 2020;58(01).



- 416 11. Gebremariyam BS. Determinants of occupational exposure to blood and body fluids,  
417 healthcare workers' risk perceptions and standard precautionary practices: A hospital-  
418 based study in Addis Ababa, Ethiopia. *Ethiop J Health Dev.* 2019;33(1).
- 419 12. Sahiledengle B, Gebersilassie A, Desta H, Tadesse G. Infection prevention practices and  
420 associated factors among healthcare workers in governmental healthcare facilities in  
421 Addis Ababa, Ethiopia. *Ethiop J Health Sci.* 2018;28(2):177-86.
- 422 13. Geberemariyam BS, Donka G, Wordofa B. Assessment of knowledge and practices of  
423 healthcare workers towards infection prevention and associated factors in healthcare  
424 facilities of West Arsi District, Southeast Ethiopia: a facility-based cross-sectional study.  
425 *Arc Public Health.* 2018; 76:69.
- 426 14. Reda AA, Fisseha S, Mengistie B, Vandeweerd JM. Standard precautions: occupational  
427 exposure and behavior of health care workers in Ethiopia. *PLoS One.* 2010;5(12).
- 428 15. Zenbaba D, Sahiledengle B, Bogale D. Practices of Healthcare Workers regarding  
429 Infection Prevention in Bale Zone Hospitals, Southeast Ethiopia. *Adv Public Health.*  
430 2020;2020.
- 431 16. Gebresilassie A, Kumei A, Yemane D. Standard precautions practice among health care  
432 workers in public health facilities of Mekelle special zone, Northern Ethiopia. *J*  
433 *Community Med Health Educ.* 2014;4(3):286.
- 434 17. Alemayehu T, Worku A, Assefa N. Medical waste collectors in eastern Ethiopia are  
435 exposed to high sharp injury and blood and body fluids contamination. *Prev Inf Cntrl.*  
436 2016;2:2.
- 437 18. Belachew YB, Lema TB, Germossa GN, Adinew YM. Blood/body fluid exposure and  
438 needle stick/sharp injury among nurses working in public hospitals; Southwest Ethiopia.  
439 *Front Public Health.* 2017;5:299.
- 440 19. Yasin J, Fisseha R, Mekonnen F, Yirdaw K. Occupational exposure to blood and body  
441 fluids and associated factors among health care workers at the University of Gondar  
442 Hospital, Northwest Ethiopia. *Environ Health Prev Med.* 2019 ;24(1):18.
- 443 20. Amerga EW, Mekonnen TG. Occupational Exposure to Blood and Body Fluids among  
444 Health Care Workers in Arada Sub-city Health Centers of Addis Ababa, Ethiopia. *Occup*  
445 *Med Health Aff.* 2018;6(281):2.

- 446 21. Beyera GK, Beyen TK. Epidemiology of exposure to HIV/AIDS risky conditions in  
447 healthcare settings: the case of health facilities in Gondar City, North West Ethiopia.  
448 BMC Public Health. 2014;14(1):1283.
- 449 22. Kaweti G, Abegaz T. Prevalence of percutaneous injuries and associated factors among  
450 health care workers in Hawassa referral and adare District hospitals, Hawassa, Ethiopia,  
451 January 2014. BMC Public Health. 2015;16(1):8.
- 452 23. Shiferaw Y, Abebe T, Mihret A. Sharps injuries and exposure to blood and bloodstained  
453 body fluids involving medical waste handlers. Waste Manag Res. 2012;30(12):1299-  
454 305.
- 455 24. Yazie TD, Chufa KA, Tebeje MG. Prevalence of needlestick injury among healthcare  
456 workers in Ethiopia: a systematic review and meta-analysis. Environ Health Prev Med.  
457 2019;24(1):52.
- 458 25. Moher D, Liberati A, Tetzlaff J, Altman DG. Group TP, Oxman A, Cook D, Guyatt G,  
459 Swinger G, Volmink J, Ioannidis J, Young C, Horton R, et al. Preferred Reporting Items  
460 for Systematic Reviews and Meta-Analyses: The PRISMA Statement. PLoS Med.  
461 2009;6:e1000097.
- 462 26. The Joanna Briggs Institute. Critical appraisal tools for use in JBI systematic reviews  
463 checklist for prevalence studies: The University of Adelaide. [cited 2020 February 10 ].  
464 Available from: [https://joannabriggs.org/sites/default/files/2019-05/JBI](https://joannabriggs.org/sites/default/files/2019-05/JBI_Critical_Appraisal_Checklist_for_Prevalence_Studies2017_0.pdf)  
465 [Critical Appraisal Checklist for Prevalence Studies2017\\_0.pdf](https://joannabriggs.org/sites/default/files/2019-05/JBI_Critical_Appraisal_Checklist_for_Prevalence_Studies2017_0.pdf)
- 466 27. Amare Z, Sheng W, Hussien A, Dawit. Assessment of knowledge, attribution and  
467 practice related to NSIS and blood exposure among health care workers in the armed  
468 forces referral and teaching hospital, Addis Ababa, Ethiopia. Int J Adv Res. 2018; 6(4),  
469 110-119.
- 470 28. Tadesse M, Meskele M, Tadesse A. Occupational exposure to blood and body fluids  
471 among health care workers in Wolaita Zone, Southern Ethiopia. Developing Country  
472 Studies. 2016; 6(7): 70-77.
- 473 29. Yenesew MA, Fekadu GA. Occupational exposure to blood and body fluids among  
474 health care professionals in Bahir Dar town, Northwest Ethiopia. Saf Health Work.  
475 2014;5(1):17-22.

- 476 30. Yakob E, Lamaro T, Henok A. Knowledge, attitude and practice towards infection  
477 control measures among Mizan-Aman general hospital workers, South West Ethiopia. *J*  
478 *Community Med Health Educ.* 2015;5(5):1-8.
- 479 31. Beyene H, Yirsaw BD. Occupational risk factors associated with needle-stick injury  
480 among healthcare workers in Hawassa City, Southern Ethiopia. *Occup Med Health Aff.*  
481 2014;2(156):2.
- 482 32. Asmr Y, Beza L, Engida H, Bekelcho T, Tsegaye N, Aschale Y. Assessment of  
483 knowledge and practices of standard precaution against blood borne pathogens among  
484 doctors and nurses at adult emergency room in Addis Ababa, Ethiopia. *Emerg Med Int.*  
485 2019;2019.
- 486 33. Gebremariam AA, Tsegaye AT, Shiferaw YF, Reta MM, Getaneh A. Seroprevalence of  
487 hepatitis B virus and associated factors among health professionals in University of  
488 Gondar Hospital, Northwest Ethiopia. *Adv Prev Med.* 2019;2019.
- 489 34. Desalegn Z, Gebreselassie S, Asemamaw Y. Epidemiology of needle stick-sharp injuries  
490 (NSSIs) and potential high risk exposures among health professionals in Ethiopia:  
491 neglected public health concern. *Am J Health Res.* 2015;3:298-304.
- 492 35. Jemaneh L. Assessment of knowledge, attitude and practice among health care workers  
493 regarding needle stick and sharp object injuries in Army force Referral and teaching  
494 hospital, Addis Ababa, Ethiopia (Doctoral dissertation, Addis Ababa University).
- 495 36. Desta B. Assessment of Knowledge, Attitude and Practice of Nurses Working in Adult  
496 and Pediatric ICU and Emergency Department Towards Standard Precautions at Tikur  
497 Anbesa Specialized Hospital from December 2016 To June 2017 (Doctoral dissertation,  
498 Addis Ababa University).
- 499 37. Aynalem Tesfay F, Dejenie Habtewold T. Assessment of prevalence and determinants of  
500 occupational exposure to HIV infection among healthcare workers in selected health  
501 institutions in Debre Berhan town, North Shoa Zone, Amhara Region, Ethiopia, 2014.  
502 *AIDS Res Treat.* 2014;2014.
- 503 38. Worku W. Hospital Acquired Infections and Infection Prevention Practice in Teaching  
504 Hospitals in the Amhara Regional State, Ethiopia (Doctoral dissertation, Addis Ababa  
505 University).

- 506 39. Hebo HJ, Gameda DH, Abdusemed KA. Hepatitis B and C viral infection: prevalence,  
507 knowledge, attitude, practice, and occupational exposure among healthcare workers of  
508 Jimma University Medical Center, southwest Ethiopia. *Sci World J.* 2019;2019.
- 509 40. Abeje G, Azage M. Hepatitis B vaccine knowledge and vaccination status among health  
510 care workers of Bahir Dar City Administration, Northwest Ethiopia: a cross sectional  
511 study. *BMC Infect Dis* 2015;15(1):30.
- 512 41. Tebeje B, Hailu C. Assessment of HIV post-exposure prophylaxis use among health  
513 workers of governmental health institutions in Jimma Zone, Oromiya Region, Southwest  
514 Ethiopia. *Ethiop J Health Sci.* 2010;20(1).
- 515 42. Mathewos B, Birhan W, Kinfe S, Boru M, Tiruneh G, Addis Z, Alemu A. Assessment of  
516 knowledge, attitude and practice towards post exposure prophylaxis for HIV among  
517 health care workers in Gondar, North West Ethiopia. *BMC Public Health.*  
518 2013;13(1):508.
- 519 43. Akalu GT, Woldemariam AT, Shewaye AB, Geleta DA, Demise AH, Debele MT.  
520 Burden of hepatitis-B infections and risk factors among healthcare workers in resource  
521 limited setting, Addis Ababa, Ethiopia. *EC Microbiol.* 2016;4(4):722-31.
- 522 44. Yimechew Z, Tiruneh G, Ejigu T. Occupational exposures to blood and body fluids  
523 (BBFS) among health care workers and medical students in University of Gondar  
524 Hospital, Northwest of Ethiopia. *Glob J Med Res.* 2013 .
- 525 45. Damte M. Assessment of the Knowledge, Attitude and Practice of Health Care Workers  
526 on Universal Precaution in North Wollo Zone, Amhara Region, North Eastern Ethiopia,  
527 2006 (Doctoral dissertation, Addis Abeba university).
- 528 46. Atlaw WD. Patterns of occupational exposure to patients' body fluids among health care  
529 workers in Tikuranbesa University Hospital, Addis Ababa, Ethiopia (Doctoral  
530 dissertation).
- 531 47. Gebreselassie FT. Investigating the compliance with universal precautions among health  
532 care providers in Tikur Anbessa Central Referral Hospital, Addis Ababa,  
533 Ethiopia (Doctoral dissertation, University of Western Cape).
- 534 48. Abreha N. Assessment of knowledge and practice towards infection prevention and  
535 associated factors among nurses working in adult and pediatric emergency in Tikur

- 536           Anbessa specialized hospital, Addis Ababa, Ethiopia (Doctoral dissertation, Addis Ababa  
537           Universty).
- 538       49. Girmaye E. Belema D. Mamo K. Daba G. Assesment of Percutaneous Exposure  
539           Incidents and Associated Factors among Health Care Personnel in Gandhi Memorial  
540           Hospital, Addis Ababa. *J Health Med Nurs*. 2018; 52.
- 541       50. Alemu B. Awareness of Hiv Post-Exposure Prophylaxis Among Health Care Personnel in  
542           Asella Teaching Hospital, Asella Town, South-East Ethiopia (Doctoral dissertation,  
543           Addis Ababa University).
- 544       51. Chalya PL, Seni J, Mushi MF, Mirambo MM, Jaka H, Rambau PF, Kapesa A, Ngallaba  
545           SE, Massinde AN, Kalluvya SE. Needle-stick injuries and splash exposures among  
546           health-care workers at a tertiary care hospital in north-western Tanzania. *Tanzan J Health  
547           Res*. 2015;17(2).
- 548       52. Tarantola A, Koumare A, Rachline A, Sow PS, Diallo MB, Doumbia S, Aka C, Ehui E,  
549           Brücker G, Bouvet E, Groupe d'Etude des Risques d'Exposition des Soignants aux agents  
550           infectieux. A descriptive, retrospective study of 567 accidental blood exposures in  
551           healthcare workers in three West African countries. *J Hosp Infect*. 2005 ;60(3):276-82.
- 552       53. Bi P, Tully PJ, Boss K, Hiller JE. Sharps injury and body fluid exposure among health  
553           care workers in an Australian tertiary hospital. *Asia Pac J Public Health*. 2008;20(2):139-  
554           47.
- 555       54. Irmak Z, Baybuga MS. Needlestick and sharps injuries among Turkish nursing students:  
556           A cross-sectional study. *Int J Nurs Pract*. 2011;17(2):151-7.
- 557       55. Nwankwo TO, Aniebue UU. Percutaneous injuries and accidental blood exposure in  
558           surgical residents: Awareness and us of prophylaxis in relation to HIV. *Niger J Clin  
559           Pract*. 2011;14(1).
- 560       56. Fereidouni Z, Kameli Morandini M, Dehghan A, Jamshidi N, Najafi Kalyani M. The  
561           prevalence of needlestick injuries and exposure to blood and body fluids among Iranian  
562           healthcare workers: a systematic review. *Int J Med Rev*. 2018;5(1):35-40.
- 563

564 **Figure and Figure legends**

565 Fig.1: Flow diagram, systematic review, blood and body fluid exposure among healthcare  
566 workers in Ethiopia , 2007–2020

567 Fig.2: Meta-analysis, 12 month prevalence of blood and body fluid exposure among health-  
568 care workers in Ethiopia, 2007–2020

569 Fig.3: Meta-analysis, lifetime prevalence of blood and body fluid exposure among health-  
570 care workers in Ethiopia, 2007–2020

571 Fig.4: Publication bias of 12 month prevalence of BBFs exposure among HCWs in Ethiopia,  
572 2007-2020.

573 Fig. 5: Publication bias of lifetime prevalence of BBFs exposure among HCWs in Ethiopia,  
574 2007-2020.

## **Additional Files**

Appendices A: PRISMA checklist

Appendices B: Examples of search strategy

Appendices C: The risk-of-bias assessment results for included studies

Appendices D: Sensitivity analysis for included studies of BBFs

**Table 1: Studies identified in the systematic review on blood and body fluid exposure among health-care workers in Ethiopia, 2007–2020**

| Name                        | Year of publication | Study design | Study population | Setting                    | Sampling            | Region               | Sample size | Response rate | 12-month prevalence of BBE exposure | Life time prevalence of BBE exposure | Risk of bias |
|-----------------------------|---------------------|--------------|------------------|----------------------------|---------------------|----------------------|-------------|---------------|-------------------------------------|--------------------------------------|--------------|
| Zenbaba D et al. [10]       | 2020                | CS           | HCWs & C         | Hospitals                  | Simple Random       | Oromia               | 394         | 97.5          | 44.9                                | 60.2                                 | L            |
| Geberemariam BS et al.[13]  | 2018                | CS           | HCWs             | Hospitals & Health Centers | Simple Random       | Oromia               | 648         | 95.3          |                                     | 39                                   | L            |
| Reda AA et al. [14]         | 2010                | CS           | HCWs             | Hospitals & Health Centers | Census              | Harari and Dire Dawa | 484         | 84.4          | 20.2                                | 28.8                                 | L            |
| Geberemariam BS [11]        | 2019                | CS           | HCWs             | Hospitals                  | Simple Random       | Addis Ababa          | 277         | 85.7          | 29.2                                | 42.6                                 | L            |
| Amare Z et al.[27]          | 2018                | CS           | HCWs             | Hospital                   | Simple Random       | Addis Ababa          | 200         | 100           | 38                                  |                                      | L            |
| Gebresilassie A et al. [16] | 2014                | CS           | HCWs             | Hospitals & Health Centers | Simple Random       | Tigray               | 483         | 95.6          | 60.2                                |                                      | L            |
| Kaweti and Abegaz [22]      | 2014                | CS           | HCWs             | Hospitals                  | Simple Random       | SNNP                 | 496         | 94.3          | 46                                  | 28                                   | L            |
| Amerga and Mekonnen [20]    | 2018                | CS           | HCWs             | Health Centers             | Simple Random       | Addis Ababa          | 361         | 93.2          | 40.2                                | 47.4                                 | L            |
| Tadesse M et al. [28]       | 2016                | CS           | HCWs             | Hospitals & Health Centers | Systematic sampling | SNNP                 | 623         | 82            | 65.7                                | 73.8                                 | L            |
| Yenesew and Fekadu [29]     | 2014                | CS           | HCWs             | Hospitals & Health Centers | Simple Random       | Amhara               | 317         | 95            | 65.9                                | 76                                   | L            |
| Yakob E et al. [30]         | 2015                | CS           | HCWs             | Hospital                   | Census              | SNNP                 | 135         | 93.8          |                                     | 45.2                                 | L            |
| Mengesha and Yirsaw [31]    | 2014                | CS           | HCWs             | Hospitals & Health Centers | Census              | SNNP                 | 162         | 73.3          |                                     | 70.4                                 | L            |
| Asmr Y et al. [32]          | 2019                | CS           | HCWs             | Hospitals                  | Simple Random       | Addis Ababa          | 123         | 96.1          |                                     | 36.6                                 | L            |
| Gebremariam AA et al. [33]  | 2019                | CS           | HCWs             | Hospital                   | Census              | Amhara               | 332         | 100           |                                     | 81                                   | L            |
| Desalegn Z et al. [34]      | 2015                | CS           | HCWs             | Hospitals                  | Convenience         | Addis Ababa          | 254         | 100           |                                     | 72.8                                 | M            |
| Jemaneh L [35]              | 2014                | CS           | HCWs             | Hospital                   | Convenience         | Addis                | 146         | 97.9          | 27.9                                |                                      | M            |



|                            |      |    |          |                            |                               |             |     |      |      |      |   |
|----------------------------|------|----|----------|----------------------------|-------------------------------|-------------|-----|------|------|------|---|
|                            |      |    |          |                            |                               | Ababa       |     |      |      |      |   |
| Destu B [36]               | 2017 | CS | HCWs     | Hospital                   | Convenience                   | Addis Ababa | 142 | 90.4 |      | 57   | M |
| Tesfay and Habtewold [37]  | 2014 | CS | HCWs     | Hospitals & Health Centers | Stratified sampling technique | Amhara      | 234 | 90.2 | 56.7 |      | L |
| Beyera and Beyen [21]      | 2014 | CS | HCWs     | Hospitals & Health Centers | Simple Random                 | Amhara      | 401 | 95   | 40.4 |      | L |
| Yallem WW [38]             | 2017 | CS | HCWs     | Hospitals                  | Simple Random                 | Amhara      | 413 | 97.8 | 56.7 |      | L |
| Hebo HJ et al.             | 2019 | CS | HCWs     | Hospital                   | Simple Random                 | Oromia      | 230 | 95.8 | 43   | 60   | L |
| Yasin J et al. [19]        | 2019 | CS | HCWs     | Hospital                   | Stratified sampling technique | Amhara      | 282 | 100  | 39   | 58.5 | L |
| Alemayehu T et al.[17]     | 2016 | CS | C        | Hospitals & Health Centers | Multistage sampling           | Harari      | 250 | 98.8 | 43.8 |      | L |
| Abeje and Azage [40]       | 2015 | CS | HCWs     | Hospitals & Health Centers | Simple Random                 | Amhara      | 370 | 98.9 |      | 69.2 | L |
| Sahiledengle B et al. [12] | 2018 | CS | HCWs     | Hospitals & Health Centers | Stratified sampling technique | Addis Ababa | 605 | 96.2 | 16.5 | 39.8 | L |
| Tebeje and Hailu [41]      | 2010 | CS | HCWs     | Hospitals & Health Centers | Stratified sampling technique | Oromia      | 254 | 95.8 |      | 57.1 | L |
| Mathewos B et al. [42]     | 2013 | CS | HCWs     | Hospital                   | Simple Random                 | Amhara      | 195 | 100  |      | 33.8 | L |
| Akalu GT et al. [43]       | 2016 | CS | HCWs & C | Hospital                   | Convenience                   | Addis Ababa | 313 | 100  |      | 57.2 | M |
| Yimechew Z et al.[44]      | 2013 | CS | HCWs & C | Hospital                   | Stratified sampling technique | Amhara      | 252 | 88.4 | 62.3 | 70.2 | L |
| Belachew YB et al. [18]    | 2017 | CS | HCWs     | Hospitals                  | Census                        | Oromia      | 318 | 93.3 |      | 62.6 | L |
| Damta M [45]               | 2007 | CS | HCWs & C | Hospitals & Health Centers | Simple Random                 | Amhara      | 351 | 93.4 | 20.2 | 45.8 | L |
| Atlaw WD [46]              | 2013 | CS | HCWs     | Hospital                   | Stratified sampling           | Addis Ababa | 290 | 87.3 | 33.5 | 66.5 | L |

|                         |      |    |          |           |                     |             |     |      |      |      |   |
|-------------------------|------|----|----------|-----------|---------------------|-------------|-----|------|------|------|---|
|                         |      |    |          |           | technique           |             |     |      |      |      |   |
| Gebrelassie FT [47]     | 2009 | CS | HCWs     | Hospital  | Simple Random       | Addis Ababa | 104 | 98.1 | 67.3 |      | L |
| Abreha N [48]           | 2018 | CS | HCWs     | Hospital  | Convenience         | Addis Ababa | 108 | 94.4 |      | 56.9 | M |
| Girmaye E et al. [49]   | 2018 | CS | HCWs & C | Hospital  | Systematic sampling | Addis Ababa | 244 | 100  | 34.4 |      | L |
| Shiferaw Y et al., [23] | 2012 | CS | C        | Hospitals | Census              | Addis Ababa | 126 | 100  | 67.5 |      | L |
| Alemu B [50]            | 2014 | CS | HCWs & C | Hospital  | Convenience         | Oromia      | 251 | 100  |      | 41   | L |

<sup>L</sup>:Low risk of bias ; <sup>M</sup>:Moderate risk of bias ; <sup>HCWs</sup>:Healthcare workers ; <sup>C</sup>:Cleaners/ Waste handlers ; <sup>CS</sup>:Cross-sectional study design



**Table 2: Subgroup meta-analysis, blood and body fluid exposure among health-care workers in Ethiopia, 2007–2020**

| Prevalence type       | Variables category          | Subgroup                  | Number of studies included | Sample size         | Prevalence (95% CI) | Heterogeneity across the studies |         |
|-----------------------|-----------------------------|---------------------------|----------------------------|---------------------|---------------------|----------------------------------|---------|
|                       |                             |                           |                            |                     |                     | I <sup>2</sup> (%)               | P-value |
| Lifetime prevalence   | Region                      | Addis Ababa               | 9                          | 2,473               | 53.00(44.47-61.53)  | 94.7                             | <0.001  |
|                       |                             | Oromia                    | 6                          | 2,095               | 53.25(44.02-62.49)  | 94.6                             | <0.001  |
|                       |                             | Amhara                    | 6                          | 1,847               | 60.83(47.03-74.62)  | 97.7                             | <0.001  |
|                       |                             | SNNP                      | 4                          | 1,416               | 54.35(28.38-80.31)  | 99.1                             | <0.001  |
|                       |                             | Harari                    | 1                          | 484                 | 28.80 (24.76-32.83) | -                                | -       |
|                       | Type of healthcare facility | Hospital                  | 16                         | 4,140               | 53.81(45.45-62.16)  | 97.0                             | <0.001  |
|                       |                             | Hospital & health centers | 9                          | 3,814               | 55.50(43.15-67.84)  | 98.5                             | <0.001  |
|                       |                             | Health center             | 1                          | 361                 | 47.40(42.25-52.55)  | -                                | -       |
|                       | Publication year            | 2007-2014                 | 9                          | 2,800               | 49.67(36.85-62.49)  | 98.2                             | <0.001  |
|                       |                             | 2015-2020                 | 17                         | 5,515               | 56.56(49.44-63.68)  | 96.8                             | <0.001  |
|                       | Sample size                 | >=300                     | 13                         | 5,612               | 54.51(44.13-64.89)  | 98.6                             | <0.001  |
|                       |                             | <300                      | 13                         | 2,703               | 53.81(46.70-60.92)  | 93.4                             | <0.001  |
|                       | Sampling technique          | Probability               | 21                         | 7,247               | 53.47(45.85-61.10)  | 98.0                             | <0.001  |
|                       |                             | Non-probability           | 5                          | 1,068               | 57.02(45.74-68.29)  | 93.1                             | <0.001  |
|                       | Risk of bias                | Low                       | 22                         | 7,498               | 52.91 (45.53-60.30) | 97.9                             | < 0.001 |
|                       |                             | Moderate                  | 4                          | 817                 | 61.27(52.38-70.16)  | 85.2                             | < 0.001 |
| A 12-month prevalence | Region                      | Addis Ababa               | 9                          | 2,353               | 39.09(28.66-49.52)  | 96.8                             | <0.001  |
|                       |                             | Oromia                    | 2                          | 624                 | 44.19(40.29-48.09)  | 0.0                              | 0.644   |
|                       |                             | Amhara                    | 7                          | 2,250               | 48.69(35.53-61.85)  | 97.8                             | <0.001  |
|                       |                             | Tigray                    | 1                          | 483                 | 60.20 (55.83-64.57) | -                                | -       |
|                       |                             | SNNP                      | 2                          | 1,119               | 55.89(36.58-75.19)  | 97.8                             | <0.001  |
|                       |                             | Harari                    | 2                          | 734                 | 31.86(8.73-54.98)   | -                                | -       |
|                       | Type of healthcare facility | Hospital                  | 13                         | 3,454               | 45.19 (38.55-51.83) | 94.5                             | <0.001  |
|                       |                             | Hospital & health centers | 9                          | 3,748               | 43.24(28.72-57.77)  | 99.0                             | <0.001  |
|                       |                             | Health center             | 1                          | 361                 | 40.20(35.14-45.26)  | -                                | -       |
|                       | Publication year            | 2007-2014                 | 12                         | 3,684               | 47.21(36.50-57.92)  | 98.0                             | <0.001  |
|                       |                             | 2015-2020                 | 11                         | 3,879               | 41.04 (30.63-51.45) | 98.0                             | <0.001  |
|                       | Sample size                 | >=300                     | 11                         | 4,722               | 43.32(31.52-55.12)  | 98.8                             | <0.001  |
|                       |                             | <300                      | 12                         | 2,635               | 45.03(37.47-52.59)  | 94.1                             | <0.001  |
|                       | Sampling technique          | Probability               | 22                         | 7,417               | 44.97 (37.50-52.44) | 98.0                             | <0.001  |
|                       |                             | Non-probability           | 1                          | 146                 | 27.90 (20.63-35.17) | -                                | -       |
|                       | Risk of bias                | Low                       | 22                         | 7,417               | 44.97 (37.50-52.44) | 98.0                             | <0.001  |
| Moderate              |                             | 1                         | 146                        | 27.90 (20.63-35.17) | -                   | -                                |         |

SNNP= South Nation Nationalities and Peoples

**Table 3: A meta-regression analysis of factors for heterogeneity of the prevalence of blood and body fluid exposure among the healthcare workers in Ethiopia, 2007-2020.**

| Prevalence estimate | Heterogeneity source | Coefficients | Std. error | p-value |
|---------------------|----------------------|--------------|------------|---------|
| 12 months           | Publication year     | -0.3185998   | 1.026952   | 0.76    |
|                     | Sample size          | -0.0190527   | 0.0242865  | 0.44    |
| Lifetime            | Publication year     | 0.7797819    | 0.940355   | 0.42    |
|                     | Sample size          | -0.0147593   | 0.020484   | 0.48    |

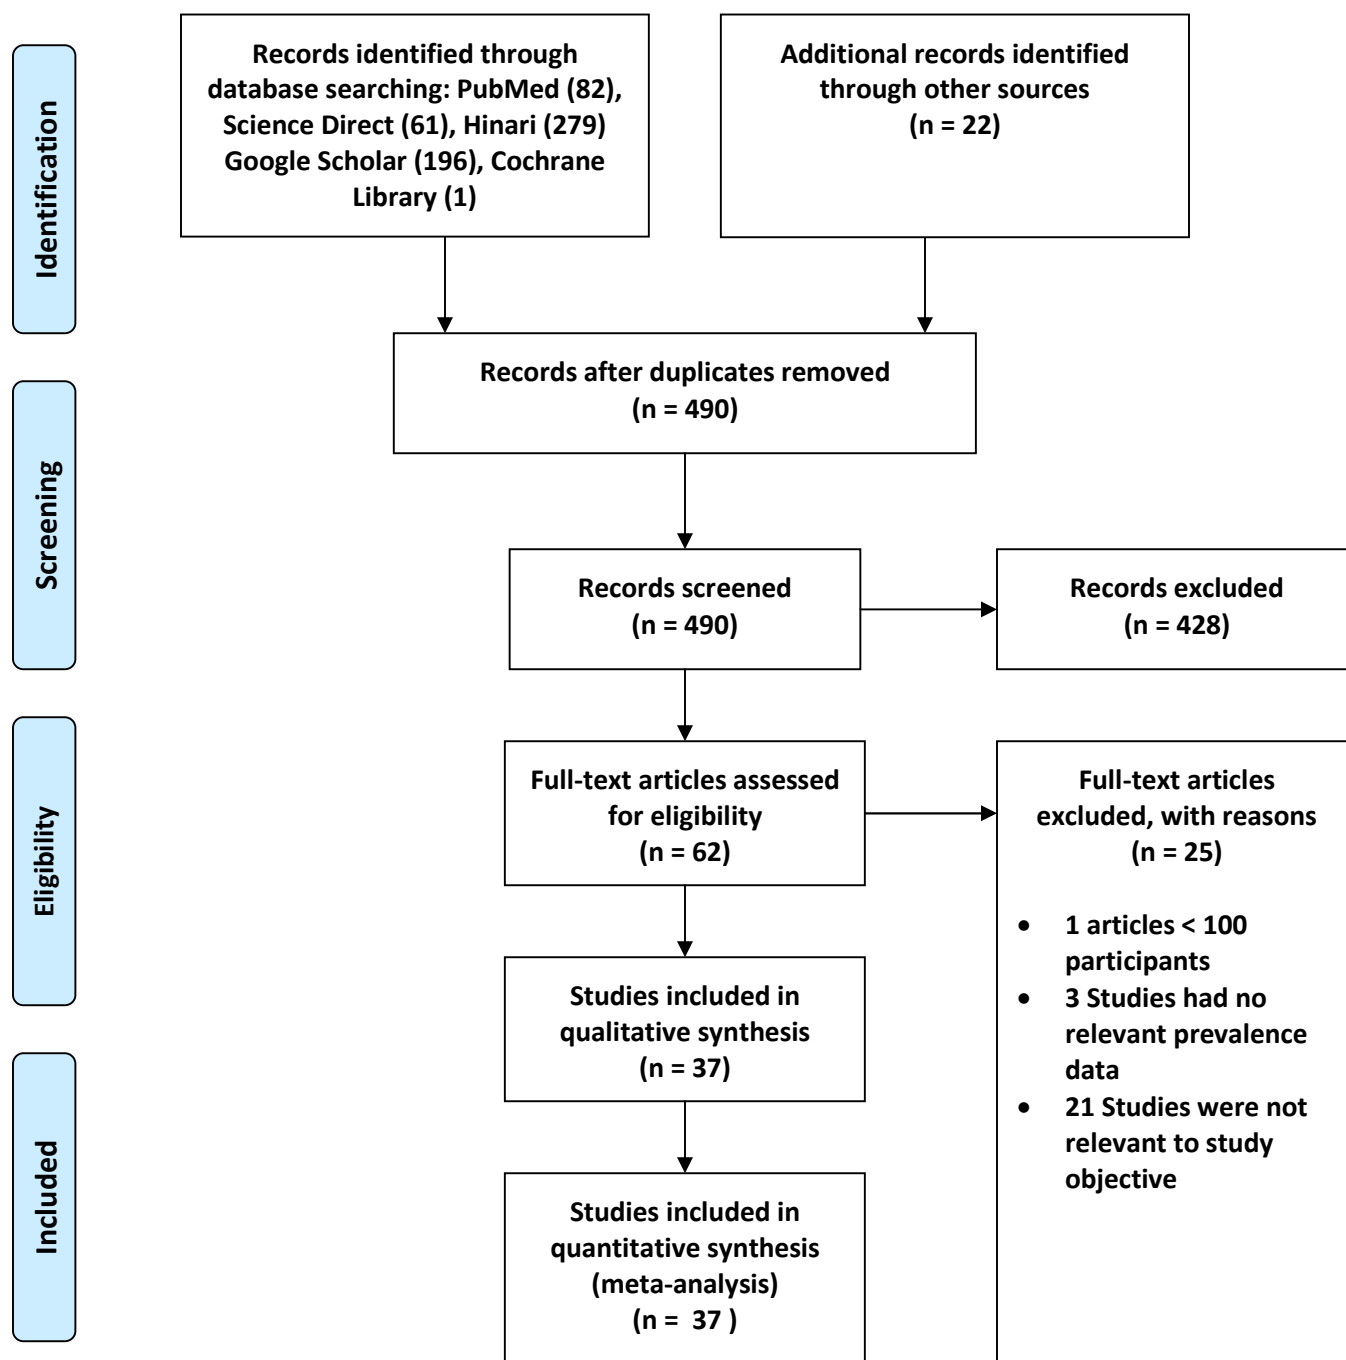

Study  
ID

ES (95% CI)

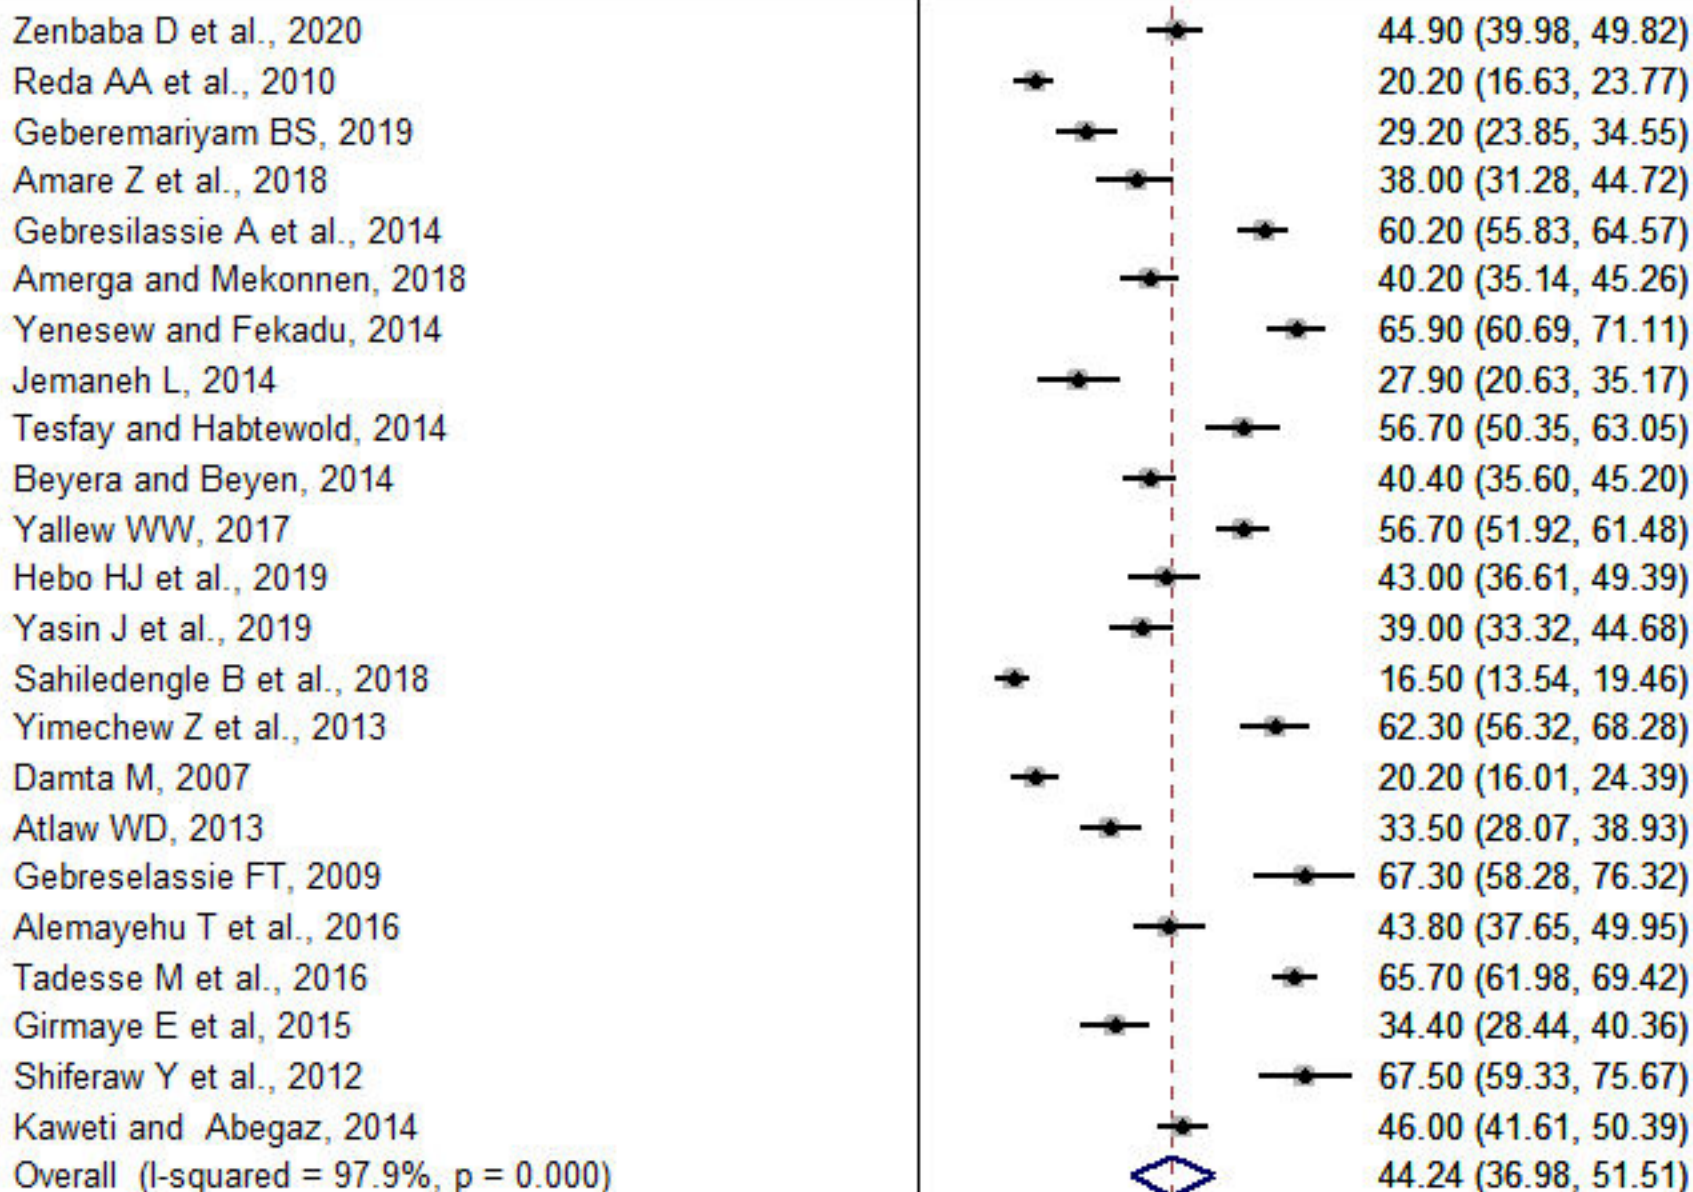

NOTE: Weights are from random effects analysis

-76.3

0

76.3



Study  
ID

ES (95% CI)

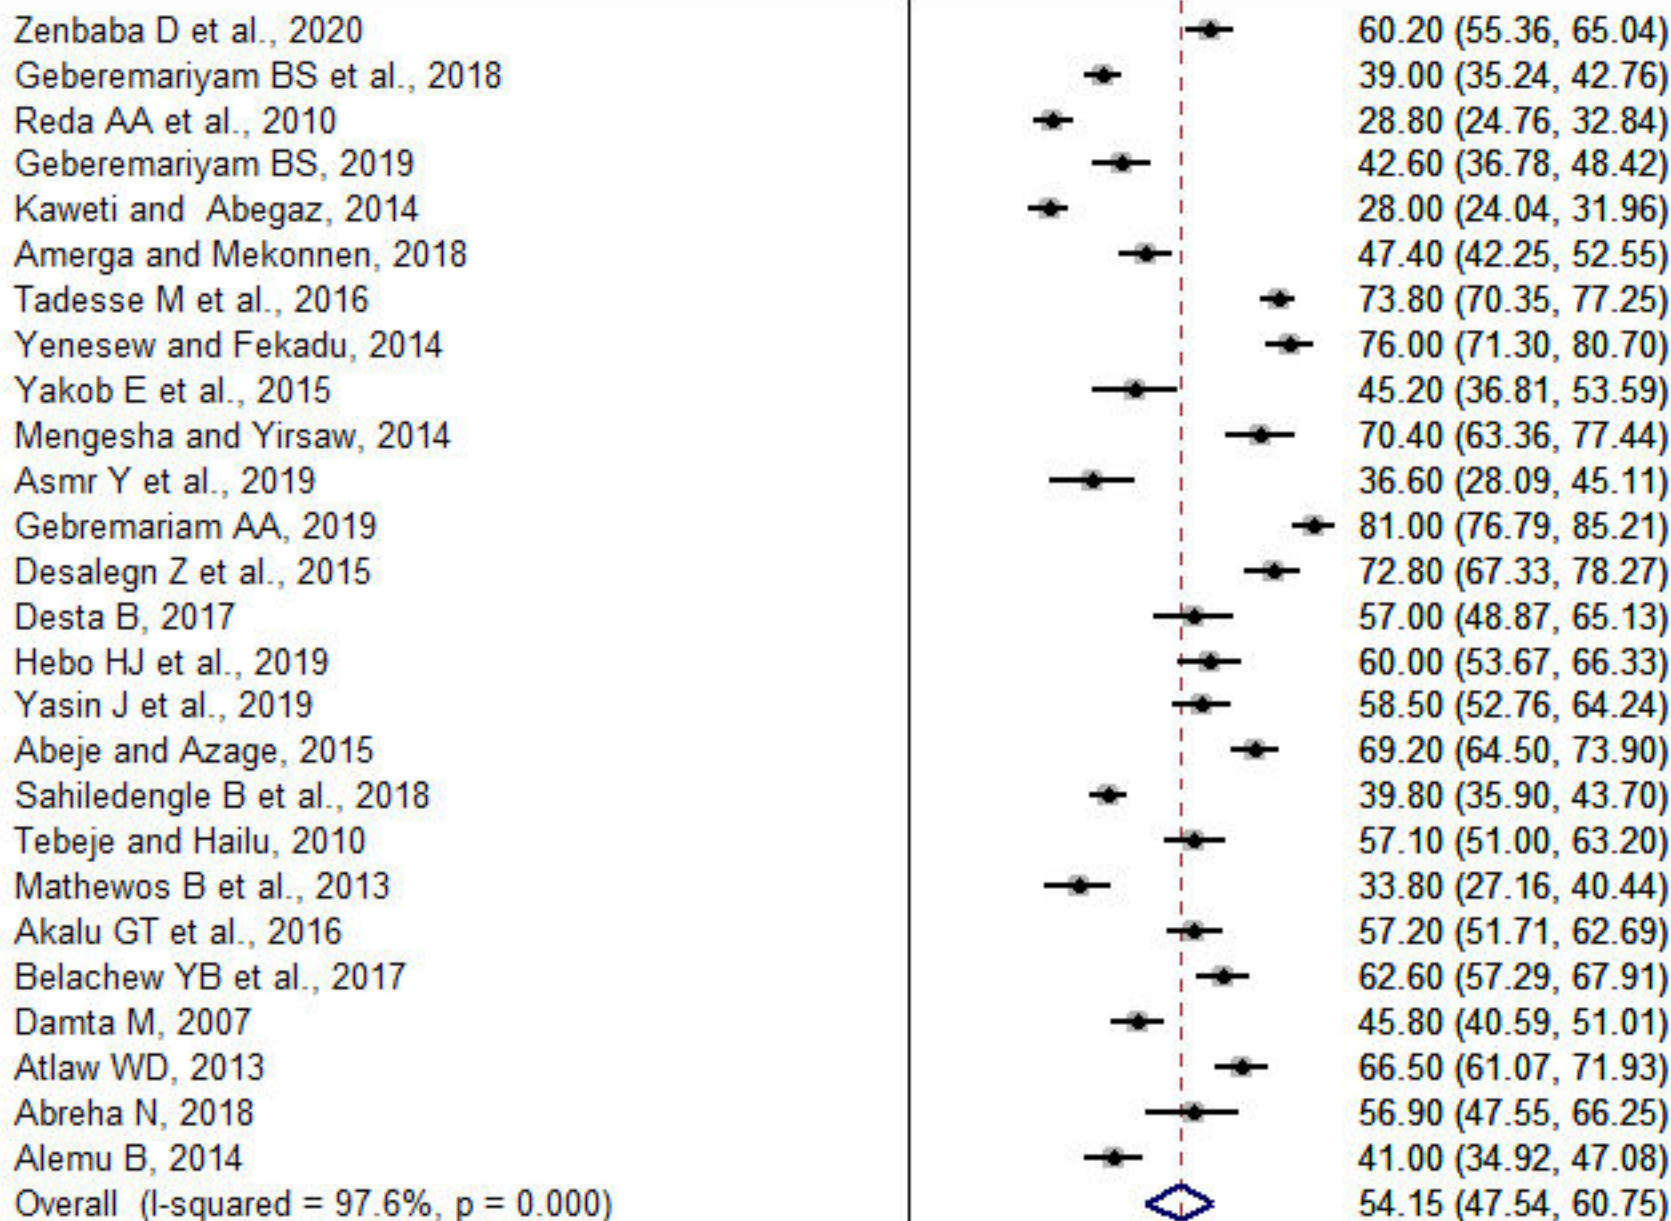

NOTE: Weights are from random effects analysis

-85.2

0

85.2



Funnel plot with pseudo 95% confidence limits

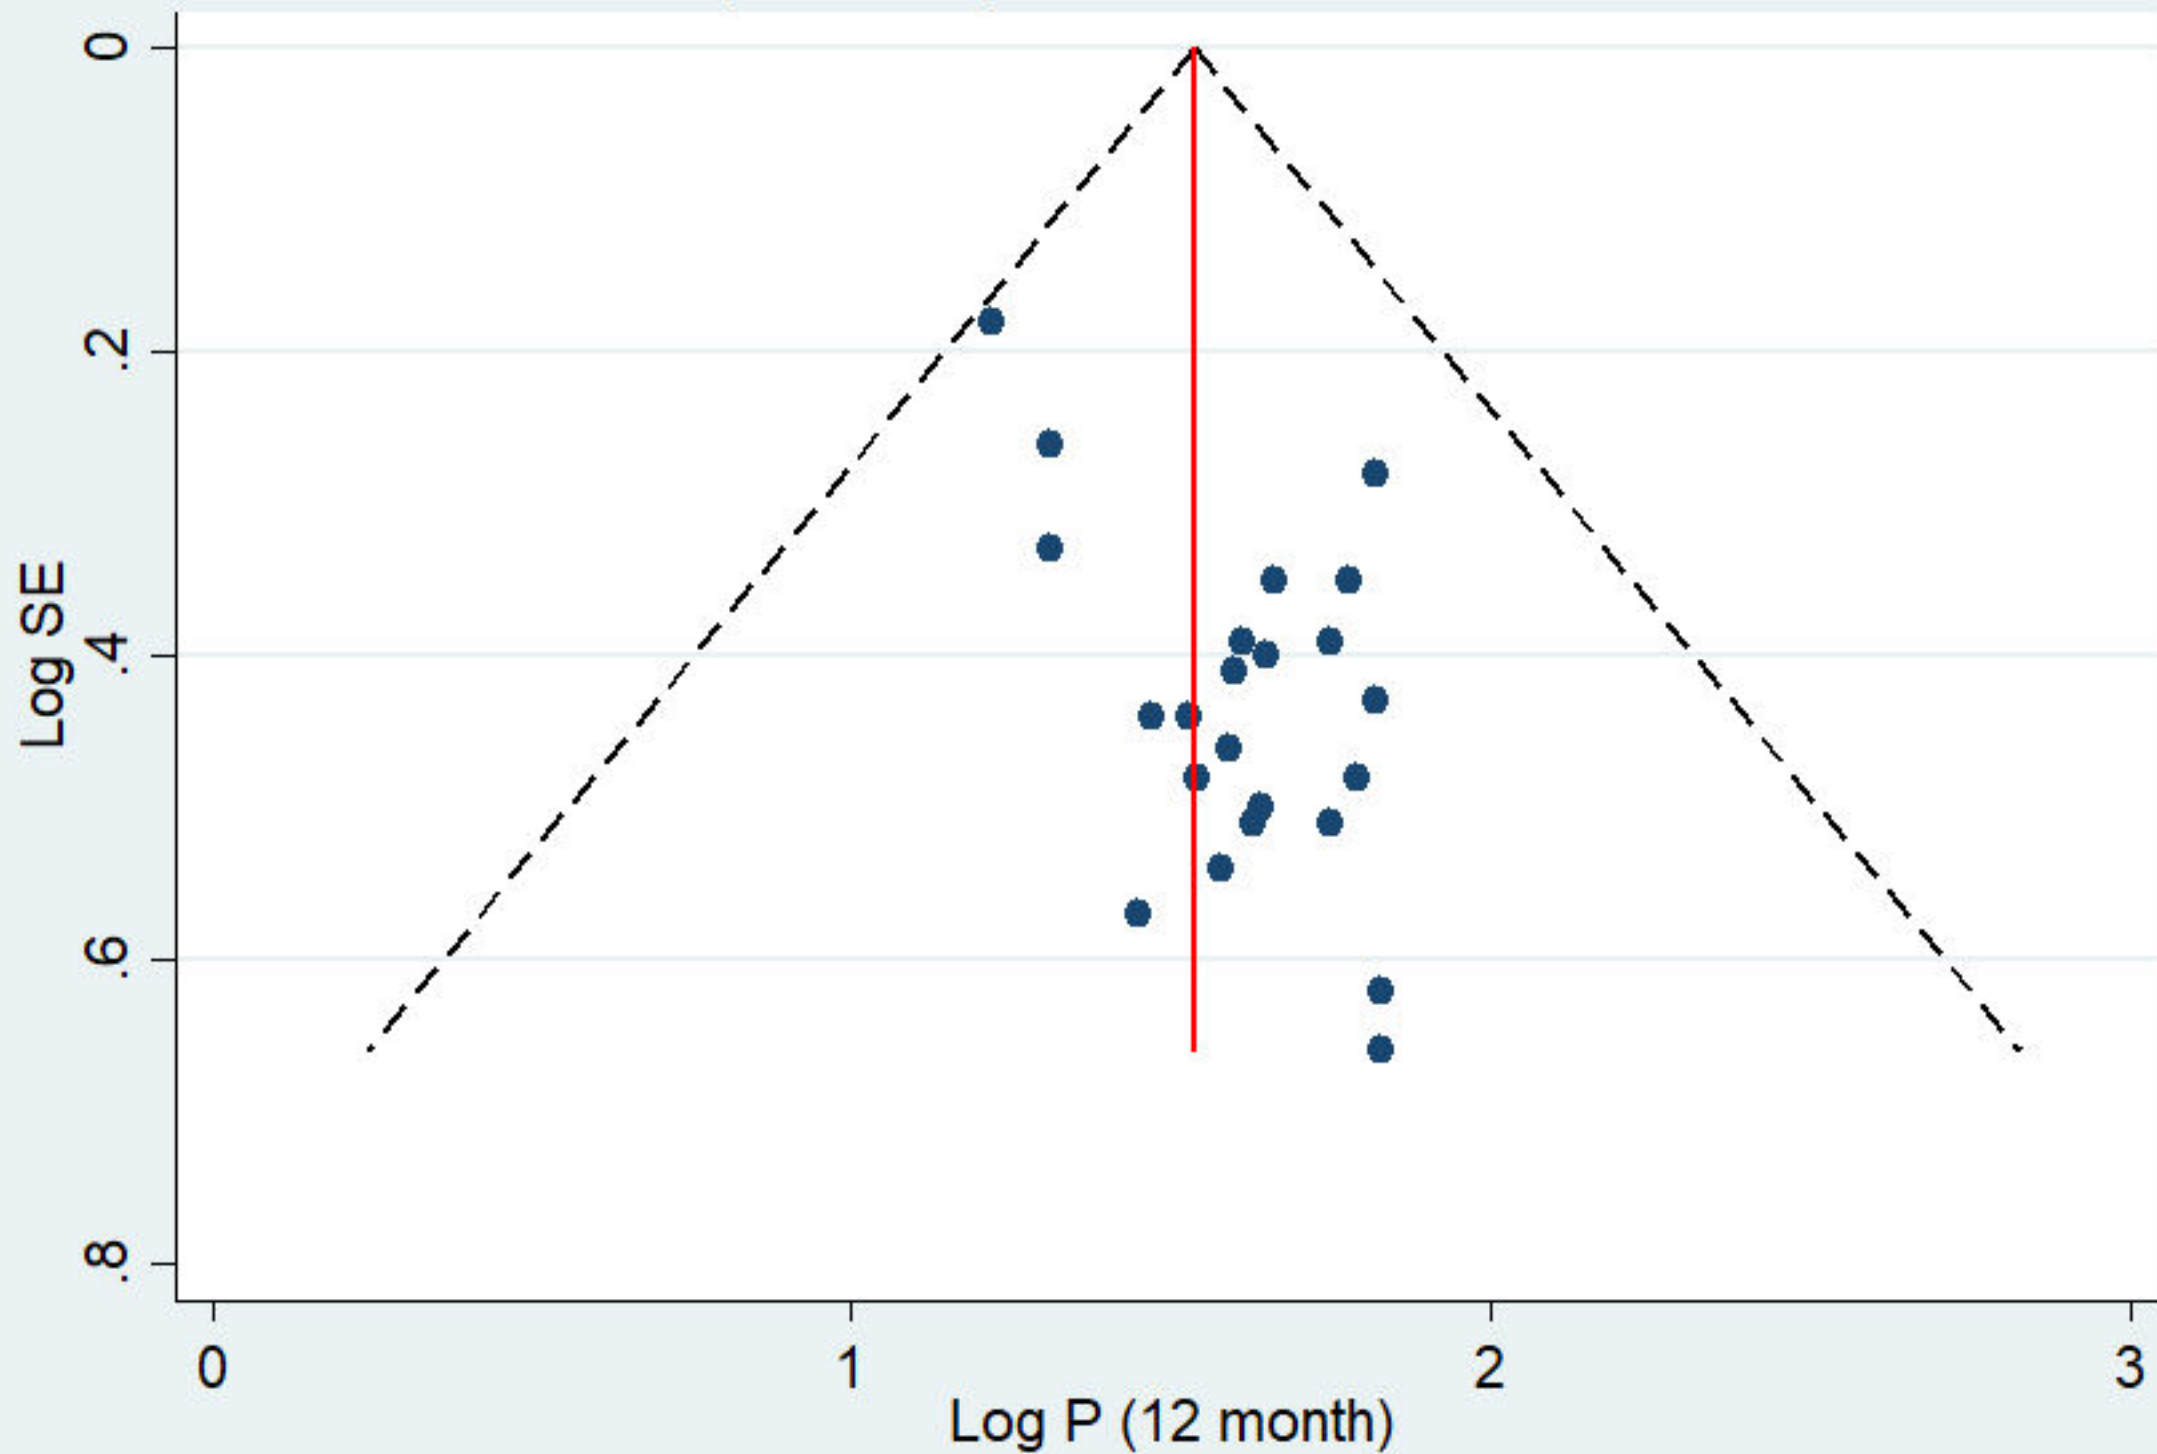

Funnel plot with pseudo 95% confidence limits

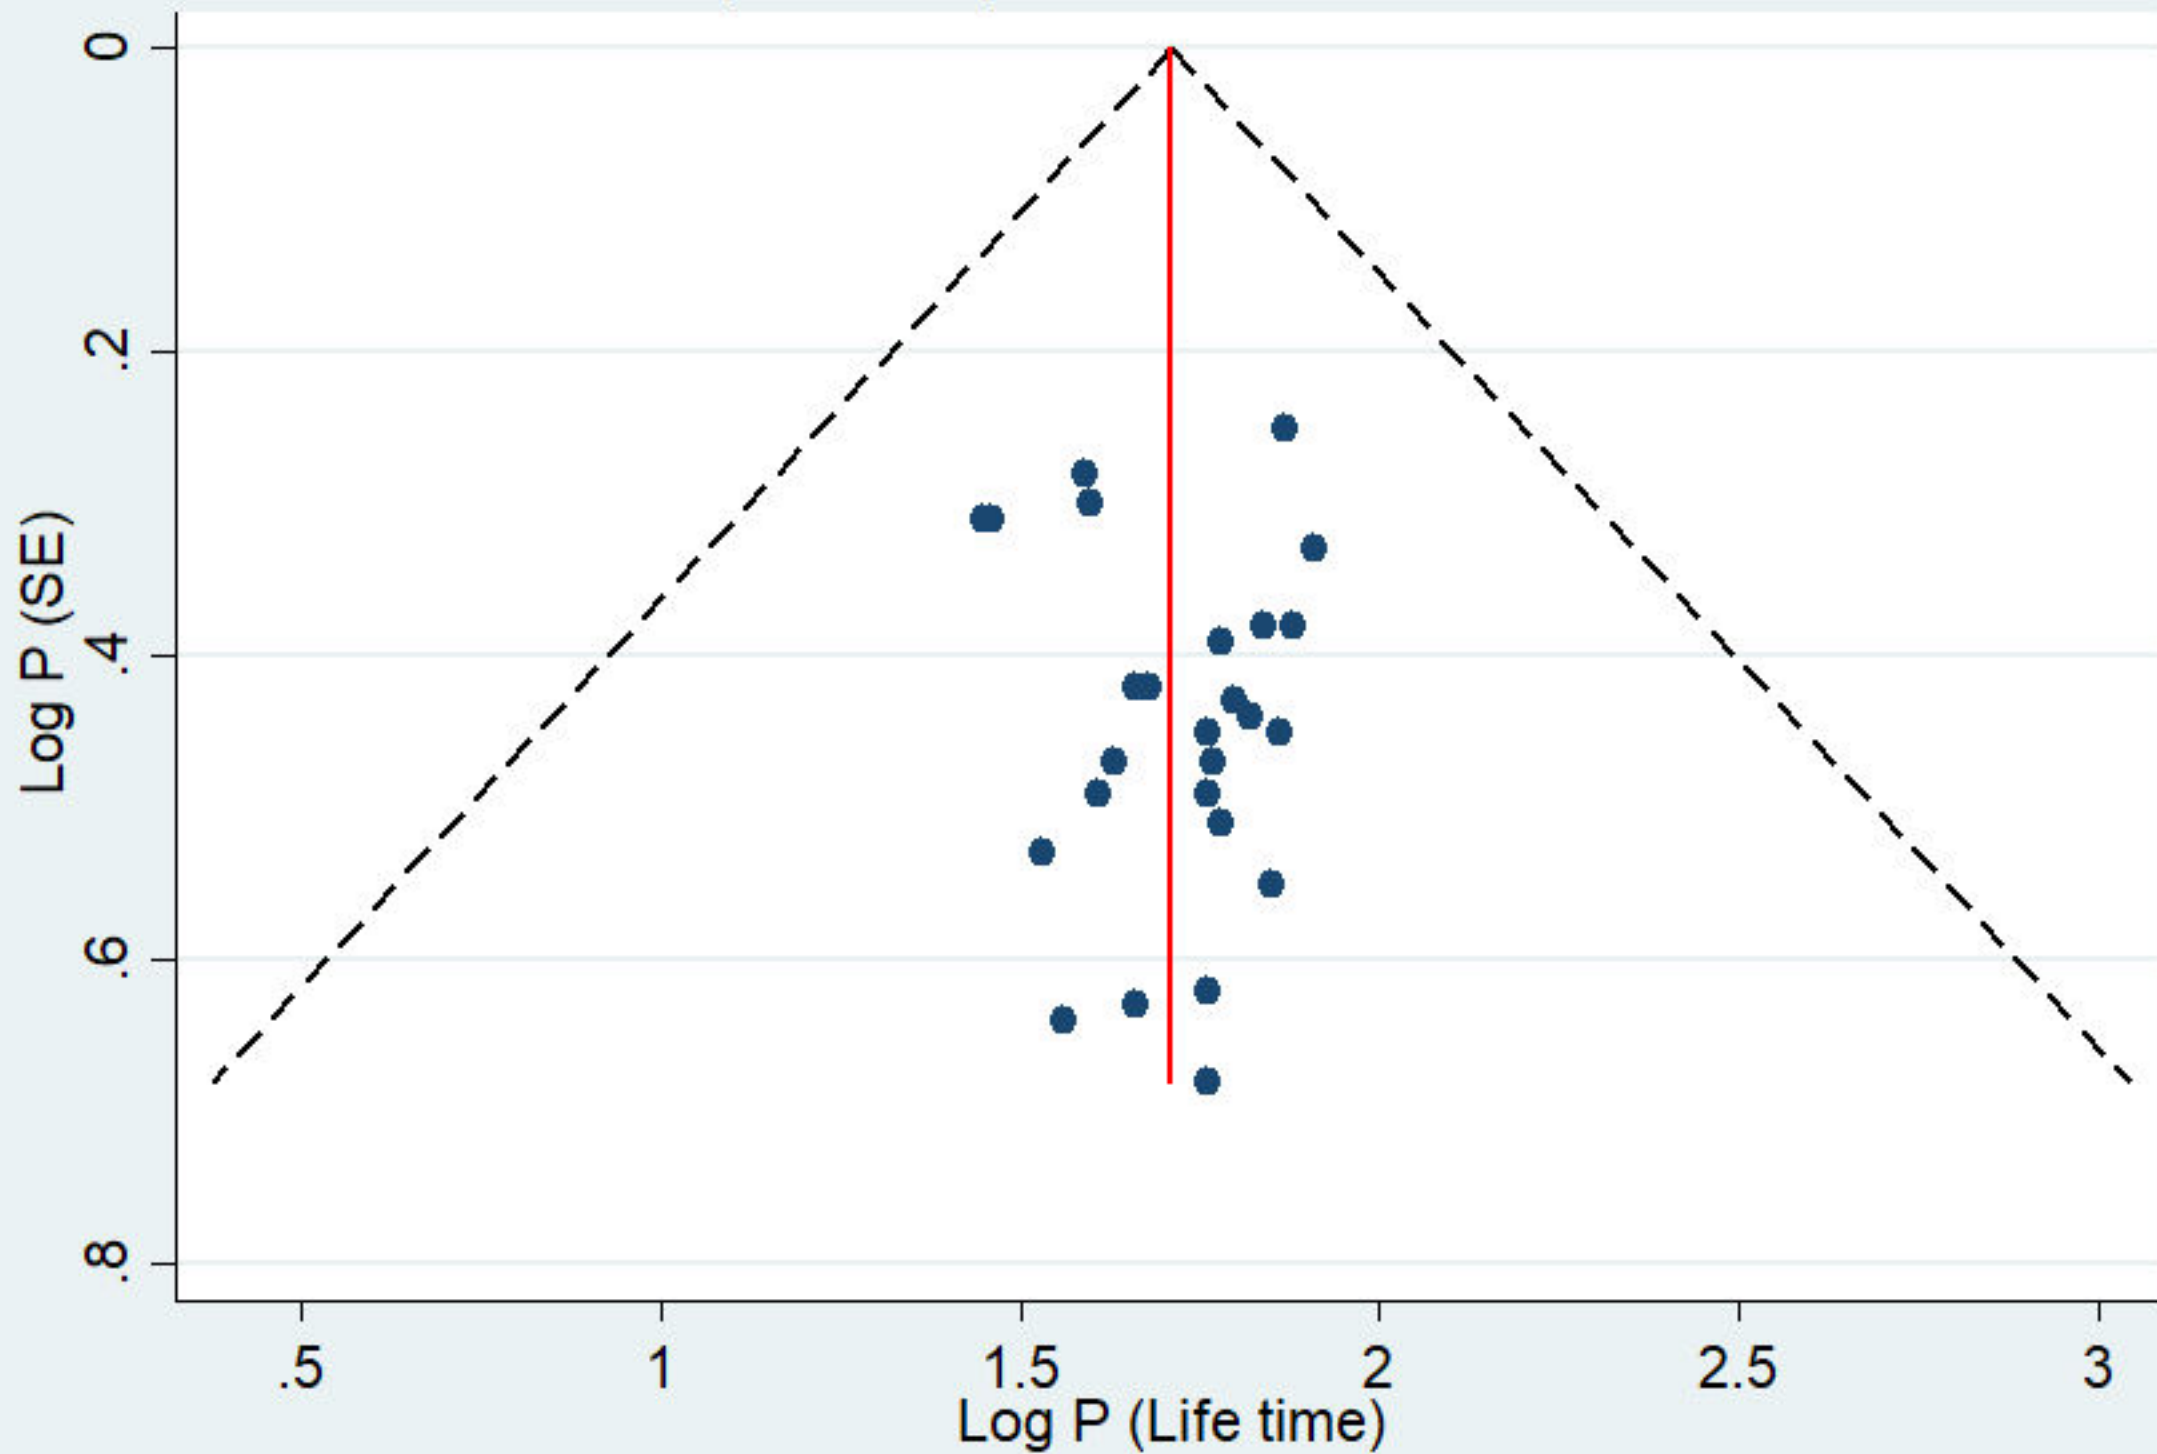

Source: https://medrxiv.org/content/medrxiv/early/2020/05/23/2020.05.20.20107953.full.pdf
